# Supplementary material
Source: publisher figshare collection journal article supplement (https://gsajournals.figshare.com/ndownloader/files/10799186)
Supplement: Supplementary file 1 [file 10799186]

## Sheet: Sheet2
Table S2. List of cells expressing Notch ligands or receptors.
apx-1	lag-2	glp-1	lin-12
ABalaaaa	MSapppa	ABarpapaa	ABplpapaaa
ABalaaaal	MSapppap	ABarpapaaa	ABplpapapa
ABalaaaala	MSapppp	ABarpapaap	ABplpapapp
ABalaaaalp	MSappppa	ABarpapap	ABplpappap
ABalaaaar		ABarpapapa	ABplpappp
ABalaaaarl		ABarpapapp	ABplpapppa
ABalaaaarr		ABarpappa	ABplpapppp
ABalaaap		ABarpappaa	ABplppaaap
ABalaaapa		ABarpappap	ABplppapaa
ABalaaapal		ABarpappp	ABplppapap
ABalaaapar		ABarpapppa	ABplppapp
ABalaaapp		ABarpapppp	ABplppappa
ABalaaappl		ABplaaaaa	ABplppappp
ABalaaappr		ABplaaaaaa	ABplpppaap
ABalaapapa		ABplaaaaap	ABplpppapa
ABalapaa		ABplaaaap	ABplpppapp
ABalapaaa		ABplaaaapa	ABplppppaa
ABalapaaaa		ABplaaaapp	ABplppppap
ABalapaaap		ABplaaapa	ABplppppp
ABalapaap		ABplaaapaa	ABplpppppa
ABalapaapa		ABplaaapap	ABplpppppp
ABalapaapp		ABplaaapp	ABprppaaap
ABalapapa		ABplaaappa	ABplaaaaa
ABalapapaa			ABplaaaaaa
ABalapapap
ABalapapp
ABalapappa
ABalapappp
ABalappaa
ABalappaaa
ABalappaap
ABalappap
ABalappapa
ABalappapp
ABalapppaa
ABalappppa
ABalappppp
ABplapaaaa
ABplapaaap
ABplpapppp
ABprapaaaa
ABprapaaap
MSppapp
MSppappa
MSppappp
Note: Reporter was defined as expression positive by an arbitrary cutoff of expression intensity in a given embryo. Only those cells with reproducible expression in two replicates are shown. Cells with dim expression or irreproducible expression may be missed.
